# Supplementary material
Source: Elsevier journal article supplement (https://authors.library.caltech.edu/71349/7/mmc6.xlsx)
Supplement: mmc6 [file mmc6.xlsx]

## Sheet: Hippocampus Counts
'Tal1'	34	18	15	21	17	12	11	4	14	24	6	8	9	14	21	23	33	18	24	24	20	13	37	16	9	10	18	25	0	8	3	18	22	12	28	11	27	33	17	11	46	46	16	9	13	17	1	23	7
'Dmbx1'	14	15	11	20	1	14	8	9	3	7	3	13	10	25	3	18	12	9	29	6	12	30	17	12	11	13	9	10	0	14	2	23	15	23	22	4	5	12	19	0	16	22	11	11	10	10	9	18	10
'Emx2'	29	23	32	29	8	13	6	6	9	9	3	2	20	21	18	15	29	14	31	14	8	17	14	18	17	12	20	24	0	11	5	38	11	32	19	11	39	32	11	11	15	20	20	5	15	23	11	43	15
'Uncx'	17	6	3	6	14	5	11	1	0	7	0	12	4	7	2	14	31	14	19	4	11	20	37	5	8	19	9	17	0	26	0	26	14	31	34	0	24	26	21	12	19	30	21	9	18	17	4	27	19
'Paxip1'	31	36	42	44	15	8	20	19	13	11	0	6	9	31	39	30	56	20	19	26	35	29	107	20	14	18	12	30	6	22	5	43	27	39	24	14	66	35	6	17	43	40	26	9	35	18	3	17	30
'Ctnnb1'	85	50	72	76	80	72	63	26	18	39	9	30	32	88	82	82	115	51	55	35	60	108	76	34	51	27	46	92	0	58	24	79	61	79	92	55	71	135	37	67	127	86	52	31	45	59	7	80	51
'Prdm1'	28	25	13	23	18	37	19	4	10	23	0	14	15	21	38	10	30	22	23	8	20	25	22	5	4	11	17	29	3	18	8	13	19	22	18	8	29	20	10	14	21	25	15	6	11	9	4	15	28
'Rybp'	30	43	34	29	28	38	13	18	16	41	11	10	13	27	18	26	48	26	35	21	17	34	70	36	13	16	13	52	0	16	4	46	26	56	49	20	68	70	48	35	57	64	22	16	27	22	5	50	9
'Nfkb2'	24	18	0	17	8	29	8	13	6	15	5	2	14	4	18	19	35	24	12	12	18	16	26	2	10	3	10	13	0	7	0	20	22	12	29	7	12	15	13	16	30	22	20	4	14	12	0	31	15
'Tfdp2'	38	11	27	18	19	23	22	14	18	18	5	8	12	22	26	12	48	17	17	12	18	26	33	11	11	10	12	24	3	9	12	26	22	49	26	34	24	51	28	9	41	29	24	16	22	16	12	43	41
'Grhl1'	38	15	24	24	17	11	7	16	10	33	3	14	14	23	23	20	28	16	9	7	22	15	55	27	9	16	16	18	1	14	8	30	20	23	31	6	24	43	30	19	45	57	15	8	37	2	1	15	29
'Sp8'	21	31	36	29	25	14	18	8	10	16	4	14	5	9	28	30	20	16	23	10	29	20	44	4	7	10	3	23	3	18	7	33	34	42	29	4	25	41	19	17	22	41	15	15	21	24	6	19	24
'Irf2'	25	23	22	32	13	33	10	0	1	15	7	5	23	14	27	19	29	17	21	8	6	27	40	15	4	9	9	22	3	20	2	17	18	22	16	7	31	24	9	14	16	41	11	5	12	3	10	14	15
'Zfp287'	7	8	18	26	10	14	14	14	1	7	0	4	19	21	14	6	48	21	2	17	3	16	43	6	15	17	9	20	0	13	7	20	19	24	51	18	20	28	9	11	36	28	23	5	24	27	1	21	7
'Esr2'	5	9	20	5	18	12	2	2	2	13	0	3	8	14	13	5	33	16	20	5	24	20	27	8	10	8	4	13	0	10	4	9	17	27	24	29	34	28	5	32	9	7	7	5	14	30	4	11	16
'Zfp128'	29	10	11	11	21	18	19	4	3	10	2	16	21	28	9	15	25	7	25	17	12	15	28	16	15	13	11	25	3	14	5	26	6	21	22	7	24	34	13	28	33	22	21	2	8	32	5	30	6
'Vav1'	7	4	23	17	13	10	16	10	8	12	5	9	21	23	15	11	22	8	4	7	4	6	31	29	6	9	7	9	3	8	13	10	7	6	28	3	23	21	6	11	20	16	10	6	19	15	6	9	15
'Sp1'	20	16	11	10	7	17	8	30	3	14	2	9	25	11	18	19	12	22	24	19	30	30	25	14	12	6	22	14	0	14	0	4	10	17	28	7	26	30	15	13	8	29	18	16	16	2	4	27	25
'Ppargc1b'	11	11	9	9	12	15	10	5	5	10	0	2	3	7	20	11	21	16	13	23	4	29	30	13	7	11	4	20	0	20	0	23	20	27	26	4	28	35	11	2	23	35	10	9	18	2	5	17	12
'Sp7'	21	32	25	36	23	43	11	10	4	20	0	4	9	26	33	15	47	13	12	27	14	25	34	17	18	5	11	28	0	23	3	42	19	43	34	15	45	14	18	12	39	39	26	12	4	20	5	20	16
'Pin1'	16	9	20	31	14	18	4	3	4	17	0	0	6	7	35	13	26	21	21	21	7	31	43	9	14	16	4	21	1	6	10	18	13	23	12	7	25	20	10	19	30	17	10	8	20	13	0	8	17
'Nfya'	26	31	24	19	22	12	5	9	5	10	1	20	5	27	27	28	21	12	24	16	22	37	31	17	8	14	28	16	0	24	9	27	26	26	38	9	17	32	24	4	44	29	11	18	22	34	3	18	16
'Vsx1'	11	18	24	28	10	6	2	8	2	10	0	14	6	19	3	3	42	21	31	12	7	16	47	12	0	9	13	5	0	15	6	21	8	32	4	18	18	40	8	3	29	19	11	15	26	1	5	22	8
'Klf1'	45	17	20	19	13	3	3	15	17	13	3	11	1	8	15	14	34	17	11	14	8	22	22	9	20	8	9	24	1	22	0	28	20	19	27	11	38	20	8	9	16	34	11	6	39	26	10	22	7
'Vsx2'	31	15	29	41	27	30	19	11	4	24	0	11	29	14	27	27	40	14	14	11	10	20	35	32	4	15	15	26	0	14	6	25	18	21	23	9	21	40	17	34	32	26	29	11	10	8	2	12	29
'Mybl1'	15	15	9	23	6	8	6	0	6	5	1	11	10	20	6	9	35	12	17	4	29	16	11	3	4	8	7	24	6	2	0	21	6	15	12	4	29	25	5	9	32	17	10	4	22	13	0	3	13
'Mybl2'	13	4	10	15	19	23	10	8	4	8	5	5	14	16	13	10	40	20	15	15	13	27	15	26	5	8	5	36	0	19	1	17	6	34	30	4	22	9	11	18	17	11	1	13	16	13	5	16	8
'Rnf2'	18	13	19	9	15	6	19	0	6	10	1	8	14	27	8	21	12	19	11	9	14	22	15	19	10	9	14	15	0	9	3	39	17	33	21	1	20	13	3	8	25	42	15	7	30	21	1	19	29
'Blzf1'	12	25	30	5	15	22	14	5	11	22	12	11	9	19	26	28	33	12	29	30	33	32	33	10	21	8	10	32	0	26	15	38	30	22	21	11	20	48	20	30	38	30	8	30	26	28	7	30	12
'Topors'	18	3	11	21	10	10	22	1	3	11	0	5	6	15	23	25	19	16	5	10	18	12	30	4	1	7	3	23	4	10	0	20	6	25	34	3	45	19	10	13	33	30	18	4	13	15	7	28	25
'Nr3c2'	53	31	19	26	33	32	13	17	6	45	5	8	23	42	18	14	71	35	27	20	18	47	63	22	11	12	19	40	18	25	4	62	23	39	34	25	43	44	20	46	59	53	31	11	44	9	7	70	32
'Nfia'	37	18	17	21	33	24	5	6	5	16	0	4	18	4	15	28	22	17	26	10	21	36	52	9	10	11	15	12	0	17	6	28	24	22	28	15	14	20	18	12	64	38	19	6	9	11	1	12	22
'Taf6l'	14	15	14	16	3	30	20	9	9	2	3	11	15	6	17	7	36	14	10	10	3	7	34	12	2	10	9	14	1	13	4	10	6	16	13	4	28	11	6	9	13	16	10	3	15	21	1	15	5
'Nr4a3'	45	11	16	20	11	41	16	4	18	8	3	8	26	9	18	22	53	30	23	27	15	32	72	11	15	17	25	30	0	47	11	26	17	18	41	7	38	37	15	33	48	37	16	7	32	15	16	51	17
'Hoxd12'	13	23	22	24	16	5	9	6	6	17	0	15	18	9	19	15	32	10	31	10	3	21	37	5	6	13	8	11	0	8	1	14	12	40	22	4	38	26	10	11	34	33	18	19	28	19	7	16	2
'Hoxd13'	25	16	11	12	10	4	6	8	6	7	5	0	7	6	16	11	17	11	12	2	6	22	27	7	7	5	6	19	0	13	0	26	11	14	17	2	9	11	11	4	16	2	7	3	6	16	0	11	1
'Ttf1'	28	26	28	31	20	10	12	2	6	18	0	8	9	23	24	8	42	13	25	3	21	14	43	13	14	6	7	21	5	6	1	36	11	24	33	4	26	19	20	16	39	22	9	5	20	22	2	26	31
'Sox9'	17	4	4	10	8	8	5	11	12	14	1	11	5	19	59	31	47	68	17	5	14	11	14	26	9	17	12	15	0	18	0	10	8	28	8	13	23	15	6	24	18	21	25	13	12	12	10	9	47
'Nr2e1'	18	3	5	15	22	13	13	9	0	2	0	4	7	7	16	6	26	6	14	5	14	18	43	13	2	12	8	15	0	13	11	30	31	28	11	15	15	19	10	14	18	22	8	7	23	10	0	9	21
'Polr2b'	19	23	46	22	11	14	17	20	5	28	0	7	14	41	38	12	35	22	17	16	17	29	51	7	10	4	22	13	0	10	12	43	23	53	68	11	53	23	20	16	25	44	16	13	41	10	1	22	14
'Hltf'	16	6	5	10	9	7	9	6	0	5	0	2	6	18	11	4	21	7	12	9	19	6	20	12	5	2	3	16	1	8	0	25	12	7	23	14	24	16	8	10	24	16	7	21	12	6	1	18	2
'Sox6'	21	29	16	17	36	14	12	3	1	23	2	1	26	14	28	23	54	37	22	9	16	37	46	32	5	11	42	24	0	25	0	30	13	17	13	16	34	48	25	44	31	40	20	16	22	21	14	21	18
'Pbx3'	31	18	28	10	0	4	3	0	6	10	0	6	12	8	14	7	19	27	18	19	8	39	27	18	10	10	9	9	0	13	8	29	14	21	5	13	44	20	2	9	20	32	0	6	13	26	8	8	25
'Sox5'	32	18	19	19	23	27	18	16	1	32	0	11	5	38	28	22	55	21	29	21	39	35	40	7	10	36	34	34	0	23	10	24	21	27	44	14	65	33	13	28	89	23	17	20	38	24	15	41	25
'Foxa1'	17	5	12	25	13	21	8	14	0	11	4	6	2	13	17	4	31	14	14	12	8	19	28	8	6	12	9	8	1	2	0	28	13	8	10	10	30	11	9	8	22	19	6	13	10	13	4	8	7
'Cdc5l'	29	16	26	23	22	18	8	17	9	11	0	4	13	29	17	14	32	11	10	12	16	22	42	0	10	12	9	27	1	16	8	8	16	14	29	12	13	21	18	18	12	37	24	14	31	22	11	40	14
'Cebpg'	17	9	25	27	12	34	2	13	8	20	1	7	14	8	12	16	48	26	19	12	14	29	48	13	3	21	6	12	0	30	0	35	14	21	25	20	29	42	19	12	21	28	13	9	9	49	1	39	8
'Ciita'	13	3	9	2	7	19	3	10	2	9	5	2	1	5	11	1	34	3	12	5	12	21	20	0	7	15	0	9	0	1	0	15	0	5	19	10	11	14	8	4	20	16	7	5	14	0	6	15	2
'Rest'	10	3	22	3	16	12	1	11	8	10	2	4	12	4	15	22	25	6	9	10	42	15	28	12	6	11	2	14	2	7	3	11	26	28	24	7	20	20	11	11	12	15	15	6	8	4	0	7	8
'Ets1'	29	7	27	14	5	10	10	13	5	21	0	13	8	20	20	8	53	7	32	12	30	19	19	27	18	3	6	12	1	19	7	24	21	18	7	9	31	19	15	23	42	12	28	14	19	11	0	7	9
'Mafk'	16	14	19	31	17	20	6	1	5	15	0	15	17	24	8	11	31	27	34	19	16	40	52	9	9	14	18	18	0	28	6	29	26	44	43	8	26	26	23	8	35	32	26	26	24	22	4	76	15
'Tbx15'	23	13	21	27	17	12	7	4	5	9	0	4	18	12	28	5	21	8	14	22	11	7	54	9	12	28	6	9	0	8	1	32	17	19	13	10	37	16	6	25	25	23	17	15	12	13	0	19	19
'Scml2'	14	14	16	15	15	14	1	5	13	10	1	1	8	11	13	7	37	1	8	5	24	16	50	17	5	10	16	20	0	10	8	17	14	8	24	2	27	24	17	26	27	49	27	10	9	5	5	27	15
'Myb'	11	22	14	21	32	33	6	23	13	11	8	1	13	17	28	8	31	14	8	24	12	21	32	24	20	7	11	12	4	7	7	27	13	20	18	18	42	22	5	20	32	38	4	27	21	17	0	15	12
'Clock'	34	34	21	19	7	32	27	15	10	16	1	19	17	31	22	7	32	34	23	10	15	48	34	22	11	17	17	38	1	26	13	33	27	21	39	8	36	30	27	19	44	50	20	15	12	38	14	55	12
'Rbpj'	30	43	25	44	26	24	4	20	26	7	6	18	27	23	18	21	55	17	21	25	27	34	42	31	18	14	10	18	0	7	11	38	16	42	24	10	46	43	13	34	37	32	27	33	23	21	1	25	20
'Foxc1'	25	11	16	26	15	17	4	7	10	17	2	18	7	12	11	12	38	35	8	12	18	12	44	26	8	11	5	20	0	18	2	10	14	10	20	5	35	11	8	18	13	19	20	26	11	16	4	14	7
'Zfp422'	27	4	27	22	5	14	7	8	7	13	3	5	0	25	8	7	34	6	16	6	15	14	33	11	18	6	9	14	0	7	4	15	14	33	19	14	20	22	6	7	28	31	9	14	8	25	0	21	10
'Pias3'	16	18	17	19	32	9	9	8	6	14	0	3	19	25	16	18	39	13	11	21	7	33	23	16	7	22	17	36	0	12	3	40	22	28	11	14	28	16	19	9	38	44	14	24	33	23	6	37	15
'Runx1'	33	26	26	19	14	28	2	3	6	5	3	5	5	25	10	4	31	31	13	24	21	28	21	8	15	12	15	28	0	11	4	9	6	24	33	19	24	18	15	10	24	29	4	3	7	15	0	6	14
'Ppara'	20	6	23	9	13	16	5	1	12	14	0	8	13	15	25	11	46	34	21	11	19	9	11	25	4	22	9	6	1	18	4	28	20	23	15	0	24	18	8	11	27	20	8	10	21	22	3	16	21
'Relb'	26	14	52	43	17	14	3	0	8	12	0	13	15	6	22	8	19	16	18	22	20	32	43	26	15	16	8	19	0	7	14	36	11	20	32	15	13	18	3	16	30	36	14	22	19	21	2	17	31
'Vdr'	13	22	11	21	1	18	11	3	7	17	0	2	15	8	18	12	24	12	8	19	23	22	30	14	5	17	24	19	6	16	12	15	24	13	26	8	17	34	19	19	17	31	7	10	21	15	0	21	25
'Cdc6'	42	28	35	24	11	26	4	0	27	8	0	6	22	16	29	14	23	7	13	21	42	14	37	10	8	26	8	15	0	14	0	19	18	33	15	20	19	20	10	21	30	40	15	29	8	16	5	34	14
'Arid3a'	17	11	5	28	10	6	11	5	16	5	4	9	4	16	5	16	44	10	11	14	9	12	26	12	16	24	10	16	0	13	1	41	13	14	35	15	49	10	19	11	35	29	15	14	28	19	0	15	20
'Lhx1'	10	6	29	14	11	16	6	6	6	5	3	3	7	5	6	2	23	7	13	16	10	19	34	12	8	15	10	17	0	11	2	15	4	30	38	5	39	29	6	7	27	28	16	0	18	29	2	7	16
'Hoxb8'	20	15	22	4	26	17	13	8	8	15	0	3	16	15	21	34	28	16	33	11	16	31	39	18	9	19	4	9	0	21	4	20	22	22	23	16	6	31	20	13	39	10	12	40	22	9	8	5	27
'Hoxb9'	9	13	10	15	15	8	6	4	1	15	0	5	4	11	18	28	29	16	23	7	11	17	41	9	7	10	13	21	1	11	1	34	42	25	32	8	22	21	24	9	36	50	11	8	11	13	4	27	18
'Hic1'	14	22	6	11	11	13	7	12	2	15	6	7	7	26	18	10	26	26	13	23	17	36	37	31	23	11	7	15	0	20	3	35	16	24	10	15	48	35	5	21	54	32	17	16	7	15	0	6	21
'Lhx6'	34	17	19	9	16	10	2	6	5	14	0	8	14	7	17	6	31	2	36	7	9	19	24	3	0	1	3	27	0	7	0	5	17	17	17	7	30	19	18	11	11	29	2	10	17	30	0	20	16
'Six4'	33	11	25	39	10	9	5	0	12	26	1	16	17	21	16	13	48	22	29	27	12	12	46	9	9	13	7	11	0	22	0	50	16	43	28	16	37	31	10	15	28	27	13	5	13	8	0	22	2
'Hoxb3'	28	14	25	8	33	21	7	0	17	20	0	10	9	30	15	10	36	17	16	21	31	29	19	14	15	6	15	18	0	23	0	37	31	41	39	20	46	41	4	20	28	36	3	22	35	15	6	25	25
'Zfp263'	5	18	21	39	9	12	6	0	6	17	0	7	15	10	11	11	43	25	14	11	17	16	38	1	10	10	7	2	0	29	2	32	10	12	29	6	6	37	2	21	31	44	13	3	21	11	5	20	9
'Cbfa2t3'	33	29	24	21	1	35	21	10	1	28	5	7	4	32	9	26	41	20	19	29	21	29	41	30	8	8	16	28	2	34	2	45	33	44	58	11	89	39	17	42	59	46	13	14	28	13	6	28	20
'Ehf'	17	14	16	12	28	16	8	3	9	14	0	3	5	15	25	4	19	18	9	13	3	18	43	15	16	22	18	19	0	22	5	39	20	32	23	8	38	29	19	12	47	34	3	16	12	26	0	31	16
'Nhlh1'	23	5	25	16	15	24	19	9	2	11	0	5	11	22	16	13	20	9	14	4	27	24	28	9	6	2	7	13	0	15	4	13	13	27	20	6	30	25	6	17	7	12	5	8	16	14	0	18	19
'Gata6'	24	4	8	22	16	21	21	6	10	18	10	5	16	10	18	14	17	12	12	8	11	10	33	18	8	6	21	23	0	13	6	25	8	15	8	12	34	22	10	15	35	29	2	6	14	18	4	26	24
'Gata4'	2	5	8	19	12	4	4	6	12	5	2	2	8	8	8	14	18	23	12	6	1	8	20	14	10	5	12	7	0	4	0	16	21	13	8	13	16	27	15	3	27	32	0	14	7	12	0	7	16
'Gata5'	18	9	17	14	6	8	4	2	4	8	2	0	10	14	14	16	12	26	16	23	15	9	24	14	19	9	14	9	0	16	2	19	19	24	13	10	22	31	16	14	37	13	9	3	12	15	0	10	9
'Lpp'	24	8	29	19	16	12	9	19	5	16	0	12	6	15	15	8	30	16	17	11	16	24	18	22	6	4	11	9	0	17	0	12	6	18	27	9	13	22	5	13	40	26	15	10	6	19	0	20	14
'Nfe2l3'	24	3	20	13	29	4	6	18	6	21	0	0	7	10	10	12	37	24	10	9	21	14	30	23	4	2	10	17	0	34	4	15	16	40	21	11	25	27	6	29	28	16	5	8	11	8	1	29	30
'Nfe2l2'	7	1	29	14	11	7	5	0	2	23	0	9	11	7	19	4	28	14	15	13	17	21	23	17	17	11	4	22	0	8	5	38	16	41	18	3	22	12	5	7	22	15	3	11	1	26	6	24	15
'Tmf1'	6	11	20	22	23	41	13	4	3	19	0	2	11	32	22	16	31	18	19	11	16	44	17	38	1	6	6	24	1	20	0	16	9	34	61	4	25	43	12	9	19	27	20	5	19	10	9	40	10
'Gli1'	19	16	34	11	12	5	11	0	5	26	0	6	9	8	10	15	11	7	15	8	4	10	26	3	12	6	8	22	0	18	2	23	11	21	11	6	17	10	11	21	18	7	27	7	15	15	7	25	11
'Tbx2'	18	6	26	21	6	17	7	0	3	11	0	3	10	12	8	16	17	26	21	2	3	8	37	8	8	5	7	12	0	11	0	41	3	7	4	4	9	7	10	18	12	19	13	7	15	14	0	25	8
'En1'	17	13	15	25	7	18	6	8	5	10	0	8	13	17	16	29	48	18	23	12	7	20	38	22	24	12	12	21	3	14	7	28	10	39	16	17	15	32	14	23	44	31	8	12	22	20	7	16	10
'En2'	18	7	24	8	15	19	10	13	6	11	0	14	6	8	32	11	15	10	19	7	14	26	20	12	17	15	15	9	7	10	5	15	11	26	18	8	31	16	23	12	31	8	15	23	3	7	1	26	14
'Hnf1a'	5	15	14	21	4	10	0	13	2	5	0	11	5	27	6	16	26	7	10	20	22	5	18	12	17	10	5	19	0	5	0	19	4	20	30	1	16	19	9	10	25	26	4	7	9	19	3	11	10
'Tbx4'	19	10	19	33	13	10	9	13	4	10	1	7	12	20	7	19	43	2	10	33	4	14	20	0	8	1	10	13	6	12	3	10	22	28	40	6	20	20	13	9	41	16	9	0	1	17	0	18	9
'Zfp423'	40	19	17	15	9	18	12	13	5	23	5	8	11	16	53	23	37	31	25	13	28	43	32	18	8	24	8	24	6	16	10	35	17	19	13	11	41	25	24	40	38	21	24	11	15	14	9	26	8
'Elf1'	23	7	16	22	11	5	5	11	3	12	5	7	19	10	6	18	35	13	7	9	12	9	6	10	11	16	8	22	0	15	4	13	3	29	12	6	12	28	10	12	19	32	18	13	12	21	9	10	26
'Foxb1'	17	4	19	11	24	3	4	2	0	5	1	2	7	14	8	12	22	7	20	21	13	22	13	4	8	17	4	17	6	10	1	22	2	22	23	13	15	22	12	13	22	7	14	7	3	10	0	13	3
'Elf2'	37	17	22	19	16	19	11	13	9	17	2	8	6	26	26	13	18	38	12	12	12	20	40	16	20	9	16	32	0	13	2	10	20	47	14	10	43	31	18	16	21	30	3	10	5	12	2	12	10
'Elf4'	2	19	15	6	7	10	9	2	5	16	0	3	8	14	26	21	15	9	6	9	15	39	25	22	6	1	13	16	0	7	5	7	17	20	12	17	25	20	5	3	16	10	9	11	6	7	1	13	17
'Mxd1'	33	10	24	28	20	13	23	14	14	18	4	14	22	20	38	26	33	15	26	20	10	17	47	17	14	7	13	28	0	11	6	27	22	27	27	7	28	28	11	30	20	31	20	21	11	21	11	31	19
'Wt1'	5	5	27	20	7	12	26	10	9	20	0	4	18	14	9	13	24	17	23	1	16	14	34	5	4	11	1	12	0	8	1	12	10	14	24	12	16	28	9	17	19	6	20	10	10	14	3	21	10
'Rfx4'	24	9	12	32	9	20	8	14	10	9	0	2	20	11	32	18	17	15	15	12	10	25	17	16	9	1	11	29	3	15	12	23	12	18	24	16	23	19	14	19	33	18	31	4	21	13	8	29	30
'Bhlhe41'	15	2	15	12	0	8	12	0	11	17	8	0	0	6	24	26	15	19	17	20	4	20	30	10	5	4	19	28	0	21	2	15	19	23	16	13	17	20	13	18	24	28	10	11	14	15	5	13	9
'Sox13'	22	9	22	14	6	21	13	4	6	6	0	0	9	8	14	6	14	18	3	5	16	13	19	13	4	1	3	13	9	11	1	21	11	21	13	3	31	11	0	7	15	18	6	7	5	8	0	17	10
'Taf4b'	20	8	23	17	21	18	11	4	11	3	1	6	5	19	27	12	25	11	16	13	12	16	24	20	13	6	15	10	4	28	0	17	13	20	28	10	33	22	21	26	21	25	28	7	5	3	8	10	9
'Rfx2'	37	14	25	39	16	18	13	7	14	24	0	6	4	32	32	18	25	6	24	3	5	19	25	10	0	4	14	30	0	13	2	28	24	36	44	13	47	27	26	10	20	41	23	5	18	29	4	27	27
'Sox17'	14	13	13	12	13	10	15	5	1	17	4	6	17	29	17	3	13	28	19	7	19	11	41	24	11	5	7	19	0	11	0	25	19	22	14	8	15	16	15	25	20	15	12	8	12	18	2	21	6
'Ahr'	27	17	19	21	26	30	9	3	4	14	0	5	12	18	14	18	38	13	35	30	23	37	38	2	10	17	24	22	7	18	7	22	25	19	34	11	27	30	3	11	33	35	12	15	20	22	0	33	12
'Sall4'	39	19	23	27	24	19	6	2	7	18	0	17	19	25	19	20	31	12	27	24	24	22	23	8	33	4	8	30	0	11	6	10	23	27	33	7	23	30	7	17	20	31	22	20	8	20	0	23	11
'Med14'	27	21	24	12	25	18	13	13	1	25	5	3	10	14	21	20	18	28	15	8	28	23	51	20	24	10	14	23	2	7	6	13	23	19	28	6	45	27	27	17	39	36	18	17	22	20	7	24	18
'Smyd1'	23	5	10	18	21	11	13	7	2	16	5	12	8	25	16	18	26	20	39	16	5	13	14	7	26	10	8	13	0	10	2	13	2	12	23	3	9	21	27	13	37	22	17	6	8	22	0	26	28
'Sall3'	12	10	15	15	3	21	7	1	5	16	1	11	9	15	24	15	33	33	15	8	6	21	24	24	2	13	11	9	3	26	1	20	2	18	11	15	48	33	3	26	27	30	11	1	10	15	3	16	19
'Arid2'	26	13	16	23	16	22	20	14	13	0	0	1	19	27	18	8	18	23	22	3	6	25	36	12	13	17	5	16	0	21	9	21	17	37	30	13	19	28	2	23	20	29	9	15	13	9	0	19	19
'Zfp64'	4	7	10	14	14	11	9	7	0	25	6	8	9	22	12	22	29	3	12	20	26	10	42	18	7	9	12	10	0	11	3	19	7	21	24	18	19	26	4	23	26	28	12	11	7	3	0	4	8
'Pgr'	39	17	29	12	11	15	13	0	5	34	0	7	7	11	43	18	38	16	15	5	10	28	22	10	11	10	0	31	0	9	3	12	13	25	28	7	30	17	14	11	24	15	12	10	17	31	3	25	22
'Trps1'	13	11	22	30	15	8	4	9	2	22	0	1	5	8	12	15	28	25	27	5	3	17	16	8	0	14	9	11	0	10	6	28	13	22	32	8	18	10	5	24	20	22	6	18	17	17	0	15	26
'Hoxa1'	15	7	14	14	17	30	7	13	14	16	0	21	8	2	16	13	36	9	21	6	23	19	21	16	1	2	9	20	0	7	4	25	28	34	18	18	21	31	10	17	11	32	13	5	14	19	0	20	20
'Bach2'	18	22	1	9	13	29	19	11	16	18	0	15	10	18	18	15	33	23	25	19	14	26	42	20	20	10	5	9	0	5	0	35	13	9	30	10	22	27	20	16	28	12	20	21	16	17	8	31	21
'Bach1'	22	9	17	16	12	29	17	29	13	11	5	16	16	38	25	13	69	14	15	36	8	19	43	24	15	41	19	33	4	10	2	8	12	26	31	13	24	17	27	18	17	46	29	12	9	22	0	21	37
'Notch3'	11	16	12	14	11	11	7	7	2	13	4	10	11	22	40	12	39	12	27	15	15	36	26	14	8	4	21	16	9	17	0	21	23	22	24	11	31	8	10	15	22	15	7	18	11	22	2	10	11
'Pknox1'	45	31	19	13	23	18	20	3	14	21	12	15	7	9	9	14	24	13	12	9	8	15	44	14	22	11	8	27	6	23	24	43	10	26	42	10	37	31	7	25	18	38	34	13	23	30	5	15	24
'Pknox2'	8	13	17	54	15	11	23	12	8	15	0	5	6	12	20	16	30	23	22	8	11	28	26	4	9	18	1	23	0	5	6	22	9	31	18	6	24	24	9	30	19	27	6	1	15	12	0	29	22
'Sin3a'	39	9	15	19	22	2	0	7	15	20	5	2	14	31	32	11	30	22	15	20	15	40	49	0	11	9	24	22	0	12	3	10	21	33	45	22	21	39	23	32	50	34	12	2	31	15	3	19	14
'Etv3'	17	22	33	22	6	25	9	3	12	15	7	7	24	23	26	6	27	12	21	19	6	45	33	17	7	6	6	26	0	6	8	20	10	35	23	8	37	33	16	19	31	24	8	4	6	28	13	22	24
'Smad9'	16	9	24	12	16	3	13	8	11	14	6	6	12	25	23	11	24	8	12	15	17	30	42	22	20	10	9	18	5	21	11	29	30	27	20	17	25	44	9	25	26	46	4	17	34	13	10	38	35
'Smad5'	25	14	7	12	18	23	4	5	4	7	7	2	14	23	16	9	26	17	26	18	12	20	60	9	6	14	10	13	0	11	2	27	8	21	20	5	37	20	14	15	27	22	25	4	24	9	3	11	22
'Alx1'	42	20	17	38	11	10	4	3	8	35	0	13	2	20	19	17	49	23	17	12	13	13	41	6	10	16	18	27	0	19	0	21	20	21	31	10	45	27	13	9	31	25	5	9	26	33	2	31	28
'Egf'	14	18	9	19	6	4	0	5	13	12	0	6	0	7	12	25	26	7	16	5	20	6	30	12	13	8	5	17	0	8	5	18	13	19	8	10	18	17	1	9	17	15	9	7	11	19	0	13	3
'Mn1'	36	11	14	19	9	19	17	9	4	8	0	8	13	25	23	14	37	19	12	2	17	17	23	20	5	11	9	16	3	8	9	30	15	40	28	12	22	53	15	15	50	33	10	13	17	13	9	11	23
'Nkx3-1'	16	22	11	9	23	8	3	13	14	24	1	4	16	15	24	4	28	21	19	4	22	20	29	14	10	7	3	26	1	8	4	12	18	22	10	16	27	26	6	17	28	17	1	9	16	18	1	26	9
'Rbak'	18	10	8	24	14	17	4	9	4	6	4	2	18	11	15	19	33	8	20	17	21	21	36	13	3	3	7	14	0	15	3	40	24	26	15	7	59	19	19	22	22	24	13	3	33	15	8	30	16
'Gabpa'	29	16	9	22	17	28	7	7	9	29	0	5	7	29	19	15	30	16	18	21	16	12	42	19	6	19	39	17	2	25	0	31	18	33	17	17	38	45	17	21	22	25	27	26	16	5	0	24	23
'Nfkbiz'	22	9	8	16	10	20	6	6	6	19	1	9	2	10	7	8	27	3	10	11	5	10	39	8	0	11	7	25	0	2	0	17	10	20	10	13	13	33	17	23	15	26	10	6	22	14	3	22	11
'Zscan21'	18	31	38	27	21	7	18	15	6	33	2	6	28	30	32	39	49	14	50	23	19	42	56	14	26	27	16	35	0	37	6	29	25	32	47	20	35	43	28	51	57	47	16	10	24	19	7	37	19
'Trp73'	8	24	31	22	15	11	3	3	9	9	1	3	13	19	10	18	47	13	24	20	15	10	33	10	0	3	7	26	0	20	0	11	15	25	12	4	24	42	21	21	32	36	12	11	5	6	4	21	16
'E2f7'	21	12	14	9	15	4	4	3	16	3	1	2	4	7	25	14	31	8	16	4	10	26	19	17	9	3	8	20	0	14	6	15	35	23	9	14	4	29	10	11	28	22	0	12	7	32	0	23	21
'Esrrg'	37	22	25	24	18	29	13	8	8	17	3	32	18	16	23	18	18	14	13	24	28	26	32	14	0	15	4	17	4	14	9	15	15	42	33	3	28	35	3	17	34	35	13	8	20	35	3	22	23
'Rbpjl'	30	17	19	26	15	13	12	9	5	15	0	8	17	20	33	28	24	16	17	40	17	25	23	19	13	8	6	27	0	7	4	42	20	23	23	8	22	28	9	19	23	18	19	9	23	15	5	47	16
'Nfatc4'	34	14	25	24	29	48	10	5	22	16	2	17	13	13	12	33	30	20	31	31	9	30	32	15	24	24	11	19	2	15	9	13	25	26	36	8	20	35	9	21	28	31	17	18	13	21	5	27	18
'Nr5a1'	12	22	14	16	15	2	7	0	4	9	4	5	6	5	11	18	26	21	10	19	13	12	22	8	5	10	11	13	3	2	0	26	14	24	38	4	22	12	8	17	21	10	12	21	5	6	10	35	7
'Neurod4'	24	13	6	45	9	11	5	5	13	4	5	9	3	16	19	17	32	19	11	24	12	13	23	20	2	16	0	9	0	18	9	18	9	13	18	10	14	33	1	8	27	40	14	13	21	7	0	23	21
'Esrrb'	20	19	15	16	15	2	13	15	0	6	0	0	21	11	2	12	29	19	16	24	8	6	11	9	14	6	6	12	0	18	0	6	3	20	18	9	34	22	2	11	27	16	12	20	18	30	2	18	21
'Tbx21'	40	37	46	29	16	15	19	10	2	16	5	3	8	18	28	21	24	19	16	22	22	19	23	1	2	5	16	17	0	22	16	24	9	12	28	1	9	22	20	24	22	24	38	6	11	29	14	41	4
'Rorc'	10	19	10	1	15	7	3	0	6	12	8	2	6	12	8	9	17	6	23	4	0	8	19	17	5	5	4	24	0	8	0	1	5	15	13	0	5	14	16	8	23	17	3	5	22	14	3	10	3
'Mitf'	19	32	3	8	11	7	18	3	9	4	3	8	5	7	11	9	34	11	23	6	27	22	32	7	10	5	6	7	2	10	13	19	30	21	10	12	20	15	19	9	18	15	16	18	15	8	4	11	15
'Pax7'	29	5	12	25	12	27	12	1	0	18	1	0	4	3	18	28	42	22	31	8	15	26	18	1	16	5	9	7	0	5	2	19	11	36	13	1	32	21	17	10	28	20	7	19	20	13	0	24	15
'Pax6'	22	11	36	14	15	22	12	0	3	11	5	8	7	17	26	8	29	10	9	21	18	19	17	13	14	14	21	15	0	13	1	33	16	10	29	15	49	21	1	16	35	20	27	15	15	36	7	22	22
'Pax1'	16	11	27	31	17	16	5	8	6	10	6	12	9	26	8	12	25	10	23	14	1	14	30	8	10	8	6	18	2	19	2	22	13	19	26	7	44	17	10	7	13	29	20	4	3	3	3	23	17
'Pax3'	18	17	26	17	4	24	13	9	8	7	0	4	6	15	15	9	46	9	27	4	16	8	44	12	0	7	16	11	0	8	1	30	19	25	21	1	15	39	8	20	36	23	11	13	16	30	12	39	10
'Pax2'	22	7	26	17	19	10	14	0	1	8	0	7	0	27	25	17	15	21	9	7	22	13	40	5	6	20	4	12	2	14	5	32	6	24	29	11	17	19	16	10	19	28	5	25	14	30	3	9	13
'Pax9'	24	11	9	16	30	19	7	6	14	21	0	11	9	13	7	14	42	5	45	24	40	49	40	18	17	29	6	16	0	8	2	17	12	32	25	20	28	25	21	10	23	20	6	9	12	21	3	55	9
'Zkscan17'	36	8	9	39	26	20	9	11	4	15	7	20	13	22	10	7	24	14	45	8	23	13	28	23	7	27	14	20	0	6	11	25	12	34	42	7	21	30	6	20	17	36	14	9	17	17	3	26	14
'Gfi1'	44	45	30	15	18	16	11	0	3	22	1	5	22	18	30	30	50	27	11	19	36	21	25	29	18	17	11	39	5	33	8	29	26	35	50	20	22	32	15	27	38	20	22	20	16	21	3	19	13
'Mzf1'	22	30	11	32	22	21	2	2	4	11	0	7	15	15	19	13	31	11	17	20	7	21	29	13	15	15	20	15	0	9	0	19	15	31	24	28	20	41	15	37	30	22	8	13	18	16	10	20	19
'Runx3'	19	11	35	38	18	21	12	19	2	11	7	6	7	15	26	20	46	10	25	4	15	24	36	14	29	9	7	28	0	20	5	28	8	25	17	22	26	25	19	13	16	28	7	11	20	15	19	26	8
'Smarca4'	44	57	87	53	12	59	33	19	26	15	8	15	10	42	45	38	65	13	33	27	25	50	107	18	18	20	21	68	9	21	19	66	9	91	90	12	62	53	22	21	59	64	37	16	60	35	2	63	41
'Foxd4'	23	6	12	19	14	18	9	12	11	15	0	1	9	7	28	6	25	13	13	8	1	19	51	15	11	10	10	20	0	17	4	11	10	13	9	12	19	11	4	18	31	18	3	4	14	19	0	14	12
'Foxd3'	19	10	12	16	16	8	9	8	3	12	5	2	5	25	4	18	25	12	18	12	9	17	46	15	7	23	3	18	4	4	0	13	2	7	20	11	28	15	8	5	11	18	15	10	5	14	1	21	15
'Creb1'	56	29	30	44	22	28	14	7	11	31	0	8	27	26	12	38	33	12	20	10	29	19	36	14	22	13	4	14	3	19	3	33	31	29	27	19	62	31	18	18	21	38	9	20	16	20	16	22	10
'Srebf1'	30	19	31	17	27	7	6	5	1	2	0	15	12	12	4	18	25	17	11	12	25	7	19	14	5	2	8	4	4	11	4	16	2	22	6	17	22	10	12	9	27	6	24	25	12	20	8	10	15
'Sox11'	16	11	18	9	9	13	10	2	13	8	3	5	12	18	14	17	29	3	18	31	6	52	58	19	11	19	10	22	5	24	5	30	9	43	15	10	37	27	11	16	24	37	7	18	14	19	2	23	6
'Gmeb2'	10	1	5	11	9	14	8	12	5	5	0	1	3	15	16	8	19	8	8	13	6	14	15	11	9	3	1	8	0	24	0	13	7	7	13	7	9	4	22	6	11	17	9	9	6	3	2	6	12
'Irx4'	15	10	8	21	4	19	37	10	0	7	8	1	6	1	32	15	18	5	23	18	18	23	30	17	13	3	18	19	5	7	5	20	9	15	14	2	19	19	16	9	16	28	19	3	4	9	5	16	7
'Pou3f2'	33	23	21	24	21	21	18	9	2	23	1	3	22	16	18	31	33	25	20	24	15	11	56	21	10	3	4	12	2	7	9	33	13	54	17	7	41	42	14	26	41	15	19	14	12	24	11	23	28
'Ikzf1'	24	7	13	20	21	19	8	17	4	14	5	7	1	19	8	6	34	15	15	18	3	17	23	5	13	4	5	15	6	20	1	15	38	18	19	8	14	19	11	13	38	16	17	26	11	32	8	29	13
'Tcf23'	13	7	7	16	13	11	4	5	6	11	1	10	13	15	12	9	32	13	13	16	11	25	38	22	13	8	5	13	0	10	2	38	17	19	17	10	23	16	9	12	25	17	1	7	26	26	7	18	17
'Mtf2'	13	14	10	17	3	6	7	4	7	15	2	12	7	12	22	18	19	2	18	9	12	26	15	4	0	10	6	19	3	9	1	27	14	33	8	8	20	13	21	16	11	28	9	11	13	12	1	18	9
'Npas3'	23	12	10	8	18	16	11	12	4	8	6	14	12	21	32	19	17	20	6	12	2	6	24	12	30	6	3	20	0	8	0	42	11	26	20	2	31	19	15	20	36	31	33	2	13	7	9	26	27
'Nfatc3'	24	9	21	15	15	17	12	7	5	27	3	6	7	9	24	20	42	5	15	19	22	25	39	29	9	11	5	24	5	11	4	20	34	35	7	14	29	36	10	26	19	31	2	15	27	21	4	25	11
'Nfil3'	22	1	33	22	11	28	5	5	9	23	2	10	9	8	25	12	37	30	15	17	10	11	34	20	25	15	7	17	2	15	3	15	12	25	20	10	30	14	12	10	8	16	10	18	14	20	0	11	35
'Phox2b'	10	6	30	34	16	30	2	1	3	11	4	7	11	15	19	8	34	28	20	7	6	27	53	15	4	20	12	18	0	17	9	10	18	26	10	19	27	32	18	11	28	16	7	2	10	16	6	22	25
'Plag1'	13	16	11	18	10	11	14	0	8	10	3	10	8	18	12	15	37	5	15	6	10	17	59	10	14	10	2	17	0	17	10	28	11	23	9	25	32	38	10	9	52	4	18	7	29	27	0	15	19
'E2f2'	14	9	19	20	10	21	6	2	8	19	0	5	19	4	23	22	20	26	24	23	8	9	29	7	17	12	12	19	0	20	0	31	9	41	13	5	47	28	18	18	31	16	13	0	16	32	0	28	9
'Ddx3x'	36	18	21	33	31	41	14	9	14	13	12	22	3	17	47	15	49	31	31	16	22	24	76	33	17	14	11	7	3	20	3	30	21	24	26	5	57	39	19	10	31	42	21	16	32	25	4	24	22
'Taf2'	29	16	25	25	18	35	20	5	2	22	7	9	15	18	11	25	47	11	18	35	29	50	37	22	9	24	9	36	4	12	2	16	23	27	14	14	22	50	4	19	43	29	16	21	16	9	0	25	28
'Pou4f1'	26	23	20	13	11	3	7	0	5	7	2	2	7	17	14	7	66	31	22	14	3	16	15	20	8	14	4	21	0	16	3	21	30	19	11	7	32	9	16	19	19	21	9	4	15	11	2	11	13
'Trim33'	19	21	33	21	19	29	21	18	0	24	0	8	19	21	15	9	21	23	31	23	2	33	60	17	8	11	11	23	0	26	12	32	30	38	46	14	39	35	28	17	31	45	23	26	25	22	4	11	26
'Tsc2'	42	23	19	34	8	25	12	31	10	15	2	24	28	23	49	24	47	53	31	19	36	11	53	8	4	16	9	25	0	20	8	38	17	31	32	8	62	49	5	20	38	32	10	13	28	27	8	34	21
'Lmx1a'	23	13	7	23	20	10	8	15	3	17	5	6	8	19	19	21	31	11	12	7	12	39	10	7	17	15	11	11	0	30	1	11	19	14	20	6	23	20	6	11	21	27	13	7	12	8	7	19	30
'Nr2f2'	10	10	14	10	19	21	6	16	0	11	0	10	8	8	6	11	8	9	19	21	3	15	26	9	9	1	2	20	1	10	5	8	5	18	18	5	42	27	2	18	27	26	23	6	15	13	9	20	10
'Eomes'	26	12	25	14	16	12	3	0	8	13	0	12	13	29	16	11	66	35	26	22	33	24	45	17	5	3	2	18	0	9	3	9	4	35	22	10	30	26	15	28	25	40	16	3	17	22	3	12	15
'Wwtr1'	27	21	30	27	18	25	14	11	14	8	0	17	10	17	12	10	22	19	19	20	50	40	20	6	11	9	11	24	7	23	3	39	11	33	25	19	30	50	15	20	40	55	37	4	28	20	5	23	15
'Foxo1'	11	11	27	34	13	19	9	11	6	8	4	18	14	19	14	15	46	12	10	10	15	22	40	37	5	9	4	12	0	24	5	6	7	32	15	3	29	23	19	15	17	31	9	13	11	20	7	20	11
'Ar'	39	10	21	18	28	14	4	13	14	24	6	18	8	21	23	36	23	9	29	20	20	28	37	11	10	8	9	34	3	18	4	26	16	38	36	3	46	37	19	31	44	61	11	5	30	16	10	17	12
'Zfp354a'	32	5	17	28	20	13	10	7	19	13	1	16	21	28	20	14	52	14	25	8	40	15	47	15	9	22	21	36	1	7	16	58	8	28	25	13	33	48	13	21	44	37	11	20	19	17	10	29	25
'Elk4'	19	22	21	32	15	9	2	0	9	26	3	14	14	20	23	25	26	22	21	22	6	30	57	14	0	6	11	19	0	9	11	32	12	41	22	7	47	29	11	19	33	32	11	7	7	24	5	31	34
'Foxo4'	11	6	19	16	19	16	11	0	9	5	1	11	14	9	15	18	25	10	14	6	17	10	16	18	8	15	7	11	0	21	8	28	13	11	9	7	36	16	5	14	10	13	11	1	5	28	1	5	5
'Sall1'	8	18	10	17	15	12	2	1	1	7	0	4	2	11	20	13	25	16	9	17	12	23	21	11	11	12	20	14	0	15	7	19	28	9	22	6	22	23	8	12	23	22	6	6	7	40	4	6	36
'Mycn'	25	28	13	22	21	11	20	18	1	13	0	2	14	16	6	18	37	25	20	14	19	20	23	9	8	8	5	29	0	21	6	20	15	18	25	13	36	31	14	21	37	23	23	19	13	38	2	22	15
'Maml3'	29	9	27	16	18	16	4	2	0	26	0	13	42	16	19	17	29	18	17	30	25	21	23	20	24	20	19	18	0	29	4	17	15	23	36	8	20	28	6	23	28	21	11	8	31	10	8	20	11
'Foxp3'	29	21	19	30	24	17	16	14	6	19	4	16	12	23	46	34	27	6	23	25	18	41	25	11	9	13	23	29	0	19	7	9	6	41	40	18	27	35	11	21	41	34	6	6	22	6	3	22	21
'Atm'	31	27	8	28	36	51	18	10	15	16	6	15	6	32	18	21	58	19	21	25	32	29	60	18	3	5	13	15	8	10	9	37	15	52	21	23	64	48	25	25	31	59	25	19	24	16	7	25	21
'Uaca'	7	3	15	22	19	7	8	4	4	7	1	3	11	9	13	8	38	8	15	29	20	24	19	3	6	4	5	32	2	11	0	31	22	19	7	12	25	12	17	20	22	40	5	23	16	9	1	18	6
'Tbr1'	21	8	12	31	16	13	9	3	13	11	2	5	9	5	4	12	22	8	16	21	10	23	30	10	1	10	6	6	5	14	7	12	8	23	29	10	26	38	8	13	25	21	12	10	12	9	6	11	11
'Pml'	11	11	16	20	14	14	1	12	13	14	2	4	3	10	12	5	13	12	12	21	6	12	37	3	5	0	17	12	0	4	14	13	11	9	15	2	8	13	8	17	27	21	16	7	5	1	0	21	5
'Lhx3'	33	5	14	30	32	15	6	2	6	13	0	3	14	13	30	12	22	11	21	20	17	27	27	12	13	5	6	41	0	26	2	19	16	29	14	9	36	15	5	18	32	34	12	8	2	35	9	23	16
'Atr'	5	6	10	9	10	7	13	12	7	15	7	3	3	24	29	9	16	11	13	8	14	14	26	6	10	5	4	13	2	11	0	9	13	31	17	12	15	19	5	14	13	24	22	20	10	5	1	5	6
'Zbtb33'	26	15	32	38	18	19	13	11	23	37	11	1	19	28	18	20	32	21	21	15	13	42	53	3	2	14	17	24	1	15	8	44	7	34	35	8	52	22	16	26	28	36	26	18	15	23	0	22	10
'Ptch1'	20	27	8	20	24	18	7	3	14	12	4	11	19	33	34	33	57	42	15	16	31	32	30	16	23	28	16	23	0	13	14	41	14	32	20	18	24	38	10	23	39	22	8	10	51	4	9	41	26
'Lhx5'	33	24	30	37	18	17	12	11	15	16	0	24	7	32	15	22	48	34	17	26	21	30	42	15	11	20	3	29	0	20	8	25	21	47	11	24	42	26	14	34	32	86	17	23	15	23	0	38	25
'Barhl1'	5	14	19	17	8	9	10	3	15	13	0	4	2	11	18	9	31	16	2	16	15	24	37	7	7	5	11	8	0	15	5	21	21	15	34	7	14	24	13	1	23	17	7	11	11	6	4	29	27
'Irx5'	16	15	17	24	33	18	15	4	6	26	4	14	16	24	22	7	35	18	28	6	25	34	24	21	15	20	13	24	2	19	2	19	7	56	10	28	18	32	14	21	55	29	15	14	38	40	0	38	8
'Tfap2b'	11	5	26	20	16	25	15	3	10	23	2	2	9	12	13	14	36	10	18	28	2	21	28	8	4	15	16	9	0	26	14	14	19	40	26	7	7	16	15	9	25	17	24	1	20	17	10	24	13
'Tfap2e'	27	20	30	19	4	27	19	8	9	7	1	4	5	25	8	6	25	6	22	9	3	18	29	12	9	6	22	9	0	10	3	16	17	29	25	13	24	20	5	23	24	36	10	6	15	23	7	19	7
'Rxra'	28	19	30	21	11	19	14	14	17	33	2	10	12	29	34	47	27	33	28	21	43	39	34	19	18	18	15	33	0	35	16	29	28	29	32	13	52	29	29	28	39	53	27	23	16	27	7	21	17
'Rxrb'	13	8	11	18	19	21	0	0	5	9	5	3	5	16	7	19	16	14	19	3	10	29	20	19	16	6	4	9	4	13	0	7	10	45	20	16	14	24	13	2	25	20	12	5	16	11	3	6	17
'Gli2'	14	12	20	4	5	13	2	1	5	7	0	6	15	17	24	9	44	24	14	7	8	19	21	12	8	16	5	8	0	13	2	8	10	28	13	14	26	5	9	19	30	15	12	8	30	10	4	22	27
'Gli3'	21	29	10	26	13	18	9	8	6	31	0	10	15	13	42	27	34	17	30	32	13	16	52	10	9	12	19	31	0	13	6	20	9	47	33	4	42	12	12	21	29	24	13	17	32	34	2	32	57
'Zic4'	43	15	26	40	14	25	8	3	11	12	3	3	17	26	9	20	34	6	24	22	25	38	17	21	10	8	8	31	0	10	6	34	17	40	21	13	23	15	4	5	50	41	15	19	12	23	3	23	30
'Zic5'	24	14	20	45	10	29	7	5	7	8	0	13	15	21	11	18	42	29	19	12	28	19	14	10	7	5	15	4	0	34	9	38	10	36	30	19	22	19	0	22	22	22	6	18	16	22	0	31	19
'Zic2'	50	24	38	21	12	20	16	24	10	26	4	9	17	18	31	19	26	20	26	26	27	15	32	34	9	14	12	37	6	25	5	26	4	14	32	11	23	38	26	36	60	36	18	15	25	41	11	22	8
'Zic3'	26	13	23	41	18	21	2	1	15	30	3	12	17	22	23	18	46	2	19	9	14	27	40	39	14	13	15	14	0	13	6	29	21	22	27	22	31	24	7	22	22	24	19	11	25	19	1	9	13
'Satb1'	10	18	20	21	15	25	11	9	6	17	0	18	13	10	9	27	46	19	11	16	18	19	36	23	6	32	13	13	2	5	4	19	22	34	20	9	28	32	13	12	26	27	6	11	9	6	0	17	15
'Onecut2'	22	24	32	16	16	18	6	0	20	9	2	21	21	24	31	7	38	25	16	6	6	14	64	12	9	16	18	13	0	14	5	23	12	62	17	10	23	8	17	22	44	35	4	10	27	26	0	28	34
'Foxn4'	31	11	22	53	15	22	20	3	23	10	3	7	21	36	16	16	41	12	26	23	15	19	25	26	7	11	19	21	0	24	6	26	8	35	26	17	15	34	9	10	25	13	9	3	28	24	5	15	19
'Mnat1'	31	10	32	38	9	27	14	3	5	7	0	28	5	13	32	6	37	26	16	21	22	13	32	21	8	2	9	19	0	9	10	28	18	46	23	34	33	36	0	6	29	37	8	9	18	33	1	24	30
'Foxn1'	19	19	28	18	17	11	9	8	1	10	0	18	7	11	10	12	26	9	20	14	9	20	22	15	17	8	13	25	3	22	1	10	10	38	24	13	34	16	3	14	42	22	9	5	12	14	7	19	12
'Dlx2'	16	10	5	7	7	16	2	21	6	4	0	3	1	28	6	18	22	26	13	23	16	7	38	21	0	6	4	11	4	13	5	24	11	22	24	12	22	22	7	14	21	40	10	9	3	6	1	27	7
'Vezf1'	32	18	29	20	34	25	15	20	8	29	17	17	20	26	33	20	65	24	30	31	7	24	39	12	19	0	22	17	0	15	4	54	22	29	64	14	41	42	9	36	39	65	10	15	19	44	4	33	25
'sncg'	53	30	48	40	34	32	10	1	15	38	1	10	21	53	27	28	72	33	39	10	21	59	106	27	9	26	24	46	0	43	3	60	31	69	50	15	67	68	11	34	75	69	13	9	35	24	4	58	31
'sst'	4	7	12	12	12	4	0	1	1	8	0	1	3	6	8	7	25	4	5	1	3	11	21	4	5	3	3	15	0	7	2	11	7	33	4	6	13	9	5	8	16	13	2	3	10	26	2	8	5
'th'	55	31	46	42	51	40	10	9	17	64	2	11	23	47	47	45	121	52	53	36	37	74	122	39	24	32	31	65	0	32	11	87	40	102	67	26	114	73	35	47	85	98	31	29	53	35	9	86	57
'vip'	25	6	17	21	17	15	7	5	13	21	1	8	13	14	25	11	34	16	19	18	13	32	39	9	13	10	14	24	3	13	5	19	10	39	21	6	38	21	17	17	30	18	15	16	19	12	3	31	18
'xdh'	63	37	60	52	40	44	25	26	16	34	8	10	41	33	41	39	90	31	64	36	19	50	88	12	18	27	25	61	4	36	10	58	30	53	72	22	46	67	26	37	46	81	32	35	35	41	14	61	20
'slc17a8'	16	6	16	13	17	9	3	4	5	19	0	13	5	12	19	13	19	10	16	5	9	23	32	8	13	8	5	13	0	17	1	25	13	18	11	13	22	25	1	18	31	29	8	8	9	14	0	20	19
'slc5a7'	42	31	33	24	43	45	12	5	8	36	2	14	9	24	32	27	69	27	34	31	30	46	76	34	20	18	29	39	2	24	11	46	26	42	38	22	56	70	25	44	60	86	26	12	27	33	9	58	29
'slc6a3'	39	19	29	21	37	31	9	7	8	34	4	9	10	21	25	26	50	26	38	30	28	49	74	16	20	22	12	23	2	22	1	41	30	43	39	18	37	36	18	26	50	45	23	20	21	18	3	45	39
'slc6a8'	16	12	14	14	31	14	7	3	7	24	2	6	8	12	22	18	27	13	25	20	19	33	41	11	6	11	12	23	3	13	6	28	13	17	29	10	27	31	10	14	37	26	18	12	13	8	3	28	18
'smad3'	41	32	30	40	41	38	25	23	17	56	9	13	9	32	41	35	72	24	27	34	28	68	81	30	23	23	33	63	6	16	11	55	31	42	65	24	36	58	30	28	94	55	22	40	24	29	14	67	34
'opalin'	17	5	21	10	11	7	2	1	2	6	2	8	4	17	13	6	23	7	12	10	11	14	35	9	14	3	5	9	0	9	1	16	16	14	9	9	21	19	0	28	15	15	8	3	12	16	1	11	10
'pdgfra'	49	29	46	45	45	46	9	5	9	29	1	13	36	44	31	34	95	29	42	34	35	60	90	35	21	18	42	41	2	33	10	64	39	48	52	24	67	51	16	61	63	68	22	21	38	30	7	55	30
'palvb'	52	31	30	45	37	25	14	10	21	19	0	19	13	34	41	32	59	34	46	25	24	61	72	28	18	25	18	41	0	27	4	57	32	43	28	18	59	41	18	30	76	54	21	17	32	34	7	44	24
'reln'	19	26	25	19	24	26	12	5	7	23	4	5	13	34	31	27	51	15	36	32	16	38	62	14	12	15	21	42	1	15	3	40	20	37	40	12	41	48	18	17	50	46	19	19	28	15	8	47	19
'slc17a7'	111	73	77	89	59	97	50	53	17	70	22	11	19	115	62	68	117	35	36	45	66	103	129	26	27	42	46	87	13	63	27	115	51	97	165	19	109	127	59	64	138	156	70	32	66	52	42	118	42
'lyve'	18	8	24	9	20	18	2	2	7	16	0	7	16	20	21	18	40	12	15	5	19	18	29	10	15	11	10	13	0	21	3	26	13	20	13	19	27	26	3	13	38	25	6	9	11	30	1	19	15
'mfge8'	31	14	25	25	31	22	2	2	6	26	5	13	15	17	79	21	44	48	15	10	24	26	53	26	5	32	17	20	0	19	1	26	20	26	27	17	21	33	10	22	30	28	53	12	20	18	5	20	96
'mog'	35	24	23	31	32	30	8	5	7	27	3	9	16	21	31	16	44	30	29	22	17	28	49	15	12	21	20	27	2	27	8	32	31	36	36	9	34	41	11	19	38	53	21	20	23	23	3	29	23
'myl14'	64	35	41	43	29	47	24	22	10	39	7	23	14	45	34	28	55	25	26	23	29	41	65	28	20	19	12	47	5	40	10	60	27	49	52	23	67	58	20	32	53	71	25	29	29	30	16	50	33
'ndnf'	32	21	28	29	28	30	28	22	13	33	5	23	16	29	29	28	63	22	29	34	32	50	61	25	17	28	15	43	6	20	6	42	17	48	49	19	50	38	35	20	57	65	24	26	25	21	6	49	29
'ctss'	12	8	15	14	15	9	4	3	6	8	0	8	8	17	15	8	29	18	15	10	17	16	25	14	18	4	7	9	0	20	1	23	27	18	12	16	25	31	7	17	17	25	7	9	10	23	1	17	17
'foxj1'	56	32	38	40	36	37	15	9	10	39	3	24	20	37	32	29	92	24	39	23	43	67	83	37	25	19	27	41	6	38	7	59	37	71	51	15	62	73	31	32	74	64	25	20	35	33	10	55	29
'gad1'	25	20	22	26	17	12	6	1	0	15	1	15	11	18	17	9	51	25	30	11	22	20	36	17	11	17	10	19	2	16	1	27	21	32	17	13	34	35	5	15	30	27	13	14	20	21	3	27	27
'htr3a'	52	36	29	26	36	28	29	18	8	39	7	14	11	35	34	35	56	31	48	40	22	54	66	36	9	30	21	63	3	25	9	62	36	47	54	25	64	47	28	44	64	48	40	26	34	32	8	61	25
'igtp'	27	27	43	35	29	30	23	22	1	29	10	13	15	29	24	37	53	28	31	30	19	37	53	17	10	18	16	34	3	18	11	32	27	54	45	18	43	45	15	22	43	56	25	19	33	26	8	34	20
'acta2'	32	14	28	13	18	14	1	3	3	18	0	5	5	36	28	8	46	10	21	5	15	26	51	16	3	9	22	17	0	27	3	36	29	32	20	10	52	44	4	24	38	37	8	5	8	21	6	32	15
'alldh1l1'	37	25	21	20	37	25	7	5	8	37	2	16	12	29	35	31	56	31	31	19	31	62	72	27	14	29	21	35	2	23	5	49	30	40	36	17	52	53	7	32	65	53	17	11	27	26	5	46	24
'camk2'	56	16	46	57	48	45	12	11	16	32	1	25	16	45	52	28	68	41	41	29	43	47	83	47	21	5	18	32	1	31	5	61	39	58	33	30	56	68	8	53	77	46	23	26	26	53	8	43	43
'chat'	28	25	32	32	46	32	16	16	9	30	3	15	16	35	38	28	68	24	37	23	25	57	84	33	22	30	24	36	4	31	3	48	40	55	45	27	63	53	24	51	78	57	22	17	27	39	13	46	39
'cldn5'	18	11	15	19	16	15	8	10	8	35	6	24	9	17	22	18	30	11	20	14	23	30	34	55	14	10	17	9	1	5	6	24	12	21	22	38	21	16	7	24	20	33	19	15	13	18	4	18	16
'ngef'	20	9	21	19	14	11	7	7	1	15	3	7	5	20	13	10	27	11	17	13	13	14	37	12	4	7	4	19	1	16	1	25	22	22	8	7	27	20	6	10	20	34	4	2	13	19	3	16	21
'tiam1'	28	14	29	30	24	25	10	4	5	16	1	3	9	26	21	12	61	18	23	17	18	26	52	23	12	15	23	15	3	23	4	33	19	34	26	20	36	41	8	24	35	45	12	13	26	15	3	28	15
'slc1a2'	54	13	47	38	44	24	3	8	8	28	1	38	29	18	71	17	83	80	36	17	45	31	53	39	30	31	6	12	0	38	7	34	36	28	19	29	40	26	2	41	49	29	33	33	12	50	2	15	50
'gja1'	11	6	13	8	16	2	2	1	2	17	0	9	9	6	55	6	20	33	10	5	14	12	8	12	3	25	4	7	0	6	2	8	8	8	3	13	14	7	1	5	16	7	19	7	6	11	4	3	45
'fbll1'	30	27	31	41	21	34	33	26	15	25	10	12	17	28	26	32	55	19	24	31	26	40	56	22	18	17	8	35	5	23	12	39	24	39	38	10	33	34	16	33	52	32	21	26	29	27	7	32	28
[truncated: 3,536 more columns]

## Sheet: Field Vector
33	33	33	33	33	33	33	33	33	33	33	33	33	33	33	33	33	33	33	33	33	33	33	33	33	33	33	33	33	33	33	33	33	33	33	33	33	33	33	33	33	33	33	33	33	33	33	33	33	33
[truncated: 3,535 more columns]

## Sheet: Centroids
490	760	2
98	532	3
872	570	3
936	590	3
432	722	3
250	740	3
52	776	3
26	864	3
1004	400	4
352	754	4
4	830	4
820	244	5
994	360	5
856	374	5
262	468	5
164	582	5
752	690	5
700	716	5
732	724	5
168	788	5
234	558	6
390	582	6
646	636	6
614	704	6
546	766	6
160	534	7
360	588	7
202	712	7
4	756	7
710	420	8
66	594	8
780	342	9
542	424	9
902	450	9
148	628	9
554	714	9
834	468	10
466	564	10
76	746	10
468	476	11
430	484	11
268	634	11
88	650	11
136	872	11
968	492	12
714	592	12
4	646	12
256	702	12
464	702	12
692	328	13
920	346	13
1020	498	13
790	560	13
554	638	13
492	642	13
598	668	13
380	672	13
152	744	13
500	814	13
232	440	14
698	546	14
646	576	14
610	608	14
340	708	14
202	754	14
854	330	15
302	496	15
566	536	15
908	552	15
918	640	15
106	710	15
692	376	16
566	440	16
962	442	16
736	458	16
780	508	16
750	540	16
190	542	16
534	586	16
476	448	17
624	500	17
26	716	17
734	326	18
768	380	18
202	660	18
298	666	18
344	568	19
342	628	19
100	788	19
296	590	20
868	420	21
806	432	21
732	508	21
438	546	21
604	444	23
940	504	23
362	744	23
417	376	2
433	453	2
541	470	2
229	474	2
341	484	2
449	568	2
341	664	2
178	693	2
712	721	2
428	228	3
746	249	3
905	346	3
29	406	3
786	493	3
852	494	3
425	524	3
753	556	3
26	602	3
112	802	3
44	852	3
9	864	3
814	176	4
902	246	4
265	441	4
602	480	4
174	824	4
2	905	4
40	917	4
800	60	5
762	104	5
610	358	5
378	390	5
653	528	5
5	686	5
713	184	6
857	262	6
338	344	6
749	466	6
92	736	6
864	205	7
688	549	7
96	568	7
98	605	7
998	312	8
88	456	8
301	506	8
697	629	8
6	642	8
170	646	8
728	648	8
764	666	8
749	697	8
689	304	9
562	361	9
738	378	9
34	550	9
841	578	9
277	618	9
373	641	9
162	728	9
42	745	9
934	313	10
810	445	10
977	460	10
876	461	10
524	554	10
617	648	10
258	736	10
306	562	11
374	589	11
277	676	11
220	769	11
846	112	12
669	237	12
544	298	12
352	508	12
730	514	12
168	516	12
700	594	12
100	666	12
333	701	12
4	760	12
689	122	13
738	154	13
309	453	13
401	481	13
470	556	13
941	188	14
844	238	14
938	240	14
462	268	14
886	317	14
654	377	14
905	400	14
117	440	14
368	460	14
485	472	14
573	506	14
609	565	14
652	616	14
433	656	14
169	784	14
814	284	15
845	405	15
149	564	15
774	633	15
29	789	15
677	156	16
666	338	16
731	430	16
710	752	16
81	824	16
893	98	17
185	469	17
522	500	17
429	572	17
326	625	17
73	776	17
40	870	17
725	274	18
974	358	18
476	598	18
440	618	18
760	122	19
937	150	19
344	400	19
708	473	19
841	172	20
660	438	20
785	568	20
776	513	21
136	672	21
388	437	22
727	449	22
450	493	22
189	740	22
994	250	23
1020	289	23
146	484	24
101	696	24
869	334	25
1018	428	25
314	674	25
656	212	27
664	492	2
632	533	2
308	737	2
350	972	2
802	210	3
767	292	3
815	306	3
754	330	3
749	377	3
389	477	3
520	681	3
208	686	3
213	828	3
394	894	3
288	977	3
226	986	3
943	105	4
961	189	4
490	344	4
277	641	4
309	837	4
813	50	5
748	120	5
745	220	5
912	259	5
699	347	5
686	419	5
600	464	5
277	888	5
326	897	5
956	64	6
927	194	6
650	229	6
780	382	6
472	443	6
523	476	6
446	540	6
664	628	6
837	2	7
569	386	7
300	606	7
646	606	7
298	629	7
500	741	7
462	774	7
515	449	8
536	525	8
248	613	8
960	16	9
1006	123	9
480	580	9
370	857	9
694	297	10
620	383	10
301	778	10
861	84	11
845	201	11
681	377	11
489	389	11
416	517	11
678	542	11
441	612	11
560	644	11
257	677	11
358	766	11
994	2	12
1021	70	12
785	97	12
702	129	12
630	256	12
739	417	12
567	419	12
598	568	12
538	594	12
394	638	12
373	720	12
420	782	12
408	469	13
241	777	13
931	168	14
768	253	14
608	518	14
332	598	14
524	713	14
320	960	14
256	1018	14
808	154	15
484	448	15
342	488	15
498	548	15
410	681	15
260	954	15
316	1005	15
761	302	16
824	313	16
630	426	16
644	598	16
816	20	17
783	195	17
466	478	17
984	42	18
894	172	18
884	214	18
750	20	19
838	134	19
310	716	19
336	872	19
982	85	20
755	269	20
750	356	20
539	382	20
357	930	20
755	75	21
593	467	21
470	714	21
422	736	21
277	784	21
388	808	22
444	816	22
633	273	23
694	320	23
212	1022	24
702	376	26
516	705	28
452	505	2
762	530	2
500	536	2
742	566	2
474	889	2
688	42	3
808	170	3
710	384	3
876	464	3
905	65	4
825	81	4
810	130	4
766	174	4
765	218	4
726	497	4
286	824	4
374	837	4
542	881	4
717	625	5
436	706	5
249	912	6
552	433	7
757	485	7
466	666	7
846	465	8
546	676	8
914	2	9
974	10	9
857	20	9
693	97	9
866	368	9
830	525	9
294	962	9
432	974	9
737	73	10
800	309	10
633	437	10
285	724	10
578	738	10
828	225	11
673	286	11
633	325	11
672	361	11
832	397	11
730	584	11
637	737	11
470	1016	11
952	48	12
773	138	12
768	366	12
597	473	12
552	618	12
352	710	12
410	933	12
753	273	13
889	304	13
570	566	13
418	758	13
452	817	13
472	869	13
477	926	13
473	988	13
386	1008	13
841	138	14
528	536	14
664	772	14
830	50	15
822	569	15
604	625	15
380	685	15
694	685	15
466	772	15
565	944	15
522	961	15
857	180	16
717	322	16
756	633	16
242	846	16
292	901	16
586	988	16
512	1004	16
329	1016	16
521	570	17
690	629	17
318	765	17
400	794	17
501	716	18
342	808	18
726	385	19
789	624	19
416	670	19
638	477	20
716	494	20
772	549	20
496	806	20
852	429	21
794	496	21
560	749	21
362	844	21
258	972	21
578	597	22
494	853	24
753	242	25
860	338	25
837	374	25
760	314	26
552	798	27
489	913	27
509	256	1
406	268	1
341	638	1
313	764	1
341	830	1
652	268	2
432	293	2
652	320	2
640	357	2
430	410	2
357	425	2
609	426	2
770	438	2
676	502	2
449	764	2
446	798	2
376	970	2
529	106	3
785	137	3
693	174	3
700	212	3
610	241	3
518	336	3
325	418	3
596	897	3
714	52	4
416	165	4
494	196	4
461	272	4
750	368	4
585	960	4
652	976	4
521	0	5
393	862	5
430	972	5
777	258	6
624	590	6
842	8	7
640	154	7
364	180	7
702	288	7
318	537	7
316	849	7
548	969	7
697	378	8
802	529	8
734	604	8
404	676	8
422	600	9
505	866	9
465	948	9
688	97	10
612	293	10
546	409	10
509	537	10
674	577	10
630	658	10
526	668	10
492	1020	10
652	1021	10
672	2	11
812	53	11
730	265	11
718	334	11
348	501	11
802	586	11
444	904	11
508	977	11
572	170	12
669	442	12
440	448	12
816	476	12
762	490	12
445	722	12
545	828	12
390	940	12
484	120	13
530	146	13
446	357	13
380	420	13
614	440	13
726	449	13
420	521	13
594	692	13
281	776	13
605	38	14
725	141	14
497	470	14
588	512	14
553	725	14
558	4	15
366	461	15
554	498	15
402	897	15
937	29	16
772	168	16
630	337	16
692	412	16
565	562	16
602	608	16
504	618	16
377	808	16
360	869	16
537	921	16
577	974	16
866	44	17
684	57	17
361	216	17
570	882	17
794	21	18
477	349	18
481	805	18
438	812	18
272	817	18
670	185	20
576	625	20
817	533	25
558	813	25
326	817	25
480	784	2
596	794	2
373	800	2
365	917	2
424	958	2
709	130	3
466	134	3
414	140	3
657	158	3
620	262	3
512	301	3
310	302	3
506	362	3
713	384	3
674	408	3
294	448	3
689	482	3
653	509	3
464	528	3
510	636	3
498	684	3
641	693	3
692	742	3
688	784	3
582	893	3
572	946	3
537	1006	3
721	556	4
309	893	4
702	926	4
586	984	4
250	94	5
394	578	5
356	718	5
765	986	5
818	1010	5
364	378	7
600	525	7
674	674	7
444	56	8
634	345	8
304	400	8
713	854	8
252	977	8
220	6	9
514	60	9
557	124	9
721	249	9
316	550	9
372	976	9
426	1017	9
241	1018	9
493	450	10
502	550	10
552	720	10
572	761	10
760	902	10
405	34	11
596	90	11
361	152	11
688	174	11
426	268	11
566	537	11
308	653	11
404	706	11
354	216	12
510	244	12
384	476	12
333	493	12
384	630	12
740	713	12
465	878	12
636	976	12
328	52	13
496	164	13
602	169	13
401	232	13
626	302	13
674	360	13
634	568	13
665	620	13
621	756	13
368	777	13
421	838	13
672	864	13
328	973	13
452	5	14
582	13	14
498	17	14
682	18	14
236	169	14
637	249	14
424	354	14
596	422	14
690	590	14
344	636	14
540	678	14
318	736	14
610	822	14
578	864	14
570	272	15
396	301	15
442	326	15
593	564	15
386	912	15
673	946	15
330	306	16
545	329	16
640	402	16
501	494	16
624	705	16
720	972	16
626	53	17
498	721	17
376	872	17
357	925	17
478	925	17
558	954	17
602	1001	17
485	97	18
314	122	18
253	53	19
622	106	23
600	145	23
346	389	23
677	681	25
578	77	27
699	587	1
743	668	1
692	729	1
555	87	2
667	178	2
704	415	2
629	473	2
476	590	2
822	714	2
756	774	2
593	806	2
881	811	2
475	840	2
707	934	2
479	944	2
719	971	2
708	39	3
486	413	3
743	574	3
622	657	3
660	911	3
545	946	3
664	865	4
841	907	5
656	602	6
517	682	6
524	756	6
595	138	7
696	758	7
411	550	8
843	669	8
609	957	8
668	967	8
619	36	9
538	235	9
627	241	9
609	431	9
481	243	10
509	503	10
800	786	10
832	826	10
486	891	10
579	894	10
792	917	10
521	922	10
568	22	11
583	367	11
409	476	11
560	507	11
457	512	11
765	512	11
479	533	11
523	774	11
653	792	11
558	174	12
458	280	12
672	324	12
683	564	12
518	616	12
702	687	12
557	851	12
764	896	12
777	956	12
643	99	13
559	287	13
637	301	13
705	319	13
438	337	13
677	384	13
744	553	13
404	651	13
412	724	13
729	929	13
665	822	14
762	9	15
513	39	15
635	155	15
439	381	15
645	510	15
512	650	15
640	694	15
603	722	15
366	732	15
693	866	15
662	29	16
462	748	16
742	458	17
406	505	17
479	695	17
733	790	17
737	989	17
726	395	18
644	648	18
751	654	18
441	696	18
382	790	18
856	790	18
786	490	19
674	775	19
702	531	20
411	580	20
731	606	21
378	678	22
545	917	22
510	373	1
557	441	1
625	174	2
354	320	2
237	478	2
402	665	2
468	677	2
529	724	2
424	45	3
480	146	3
249	540	3
644	657	3
302	832	3
665	906	3
785	957	4
749	982	4
373	122	5
944	960	5
532	286	6
658	446	6
685	778	6
504	792	6
416	64	7
553	85	7
734	186	7
605	210	7
445	304	7
714	362	7
197	452	7
260	676	7
606	786	7
692	576	8
600	589	8
681	700	8
378	760	8
329	786	8
493	940	8
694	997	8
522	4	9
698	866	9
529	874	9
260	988	9
578	141	10
474	276	10
412	297	10
404	393	10
438	398	10
345	402	10
456	458	10
301	460	10
758	758	10
254	862	10
272	914	10
462	944	10
876	969	10
912	1008	10
845	1013	10
392	42	11
752	226	11
512	340	11
758	340	11
457	353	11
276	422	11
637	514	11
441	784	11
417	208	12
317	221	12
389	248	12
446	252	12
670	256	12
592	276	12
597	330	12
376	441	12
392	494	12
737	722	12
730	940	12
533	34	13
564	64	13
412	146	13
721	149	13
442	162	13
762	268	13
714	304	13
658	337	13
620	376	13
478	506	13
477	633	13
404	716	13
540	181	14
622	353	14
711	451	14
598	476	14
562	540	14
766	1009	14
473	320	15
272	362	15
640	564	15
738	673	15
549	708	15
642	754	15
570	802	15
465	817	15
717	877	15
556	989	15
562	116	16
528	462	16
305	585	16
260	624	16
293	673	16
510	682	16
349	810	17
670	952	17
220	956	17
610	997	17
634	290	18
345	297	18
704	676	18
648	710	18
425	774	18
393	828	18
517	829	18
530	510	19
726	798	19
700	760	20
701	273	21
925	982	21
210	1010	21
565	237	22
245	505	22
753	922	22
772	809	23
769	858	23
774	961	23
254	413	24
692	661	27
444	342	1
462	404	1
442	438	1
802	646	1
456	684	1
206	722	1
296	774	1
610	782	1
457	794	1
741	809	1
793	844	1
314	860	1
561	909	1
646	920	1
166	29	2
41	113	2
820	446	2
278	456	2
937	602	2
784	946	2
937	981	2
870	1006	2
222	128	3
121	186	3
101	216	3
406	278	3
344	513	3
360	561	3
349	578	3
494	682	3
958	745	3
962	778	3
997	794	3
416	844	3
965	869	3
681	909	3
434	1006	3
40	37	4
413	390	4
177	418	4
277	426	4
554	477	4
605	482	4
850	581	4
240	654	4
364	720	4
732	900	4
182	197	5
484	518	5
396	634	5
420	734	5
797	428	6
569	624	6
590	694	6
909	745	6
44	154	7
18	268	7
173	284	7
205	357	7
172	401	7
236	450	7
265	584	7
214	588	7
721	628	7
306	644	7
785	782	7
926	801	7
121	436	8
117	500	8
261	502	8
749	597	8
260	689	8
777	689	8
513	304	9
54	308	9
448	310	9
340	680	9
520	762	9
769	840	9
833	952	9
10	116	10
428	232	10
314	280	10
94	349	10
282	373	10
397	481	10
630	533	10
409	773	10
1006	882	10
482	920	10
420	928	10
669	1013	10
589	1018	10
156	225	11
292	234	11
294	322	11
346	338	11
58	348	11
697	690	11
864	710	11
534	857	11
982	968	11
186	58	12
128	265	12
429	580	12
336	592	12
545	696	12
258	761	12
1006	932	12
57	5	13
304	37	13
126	100	13
242	357	13
656	472	13
853	505	13
205	509	13
725	528	13
740	554	13
597	598	13
738	646	13
708	738	13
329	744	13
736	944	13
329	165	14
308	198	14
52	284	14
917	606	14
890	660	14
1001	733	14
638	761	14
588	838	14
692	872	14
873	892	14
120	6	15
165	168	15
238	242	15
488	381	15
328	404	15
682	565	15
425	656	15
877	786	15
449	874	15
624	882	15
560	945	15
409	1017	15
500	1018	15
81	214	16
537	381	16
204	444	16
722	465	16
758	465	16
796	500	16
637	706	16
250	18	17
284	161	17
92	162	17
361	265	17
553	501	17
180	584	17
777	600	17
238	278	18
669	526	18
826	586	18
345	228	19
377	306	19
116	413	19
63	431	19
136	469	19
673	485	19
958	705	19
802	777	19
722	808	19
148	357	20
532	893	20
445	276	21
561	452	21
916	960	21
936	760	22
977	800	22
968	929	22
397	968	22
468	1001	24
270	394	25
752	550	26
484	962	27
451	223	1
429	392	1
294	410	1
259	485	1
426	488	1
167	490	1
824	640	1
811	662	1
593	715	1
559	780	1
167	792	1
382	808	1
569	850	1
388	861	1
439	871	1
205	87	2
76	220	2
389	222	2
220	244	2
350	266	2
158	314	2
71	327	2
600	338	2
222	456	2
688	473	2
430	577	2
193	625	2
415	627	2
279	632	2
785	667	2
840	734	2
90	740	2
89	818	2
171	869	2
271	895	2
479	909	2
769	935	2
488	961	2
967	987	2
58	49	3
694	340	3
726	357	3
777	513	3
198	576	3
525	725	3
973	741	3
683	796	3
960	925	3
647	981	3
786	985	3
324	990	3
727	1013	3
291	127	4
217	187	4
420	258	4
350	418	4
569	599	4
966	629	4
347	749	4
748	834	4
592	870	4
269	33	5
51	128	5
636	389	5
592	516	5
905	772	5
938	833	5
848	840	5
387	364	6
635	479	6
226	535	6
371	701	6
134	706	6
1006	999	6
118	293	7
283	523	7
134	548	7
238	851	7
765	913	7
122	37	8
178	149	8
471	386	8
654	563	8
656	624	8
317	630	8
939	699	8
72	809	8
345	884	8
661	921	8
240	940	8
351	188	9
489	289	9
236	348	9
576	423	9
607	597	9
536	625	9
3	649	9
467	718	9
646	779	9
795	827	9
644	841	9
442	852	9
127	971	9
303	213	10
105	251	10
269	310	10
562	319	10
119	386	10
642	520	10
400	521	10
244	568	10
123	648	10
776	789	10
196	914	10
819	1003	10
187	323	11
737	476	11
734	521	11
333	672	11
710	720	11
881	730	11
983	830	11
986	912	11
877	947	11
577	1017	11
145	111	12
263	168	12
337	233	12
335	315	12
391	344	12
64	371	12
543	393	12
67	433	12
336	468	12
758	604	12
894	628	12
1021	703	12
33	730	12
388	781	12
342	929	12
787	953	12
372	955	12
579	976	12
78	83	13
14	91	13
366	333	13
400	405	13
839	545	13
1006	644	13
181	695	13
967	774	13
546	819	13
124	875	13
376	1009	13
222	44	14
109	156	14
187	253	14
698	368	14
595	465	14
432	466	14
26	562	14
469	615	14
847	661	14
626	730	14
146	794	14
893	852	14
1002	861	14
522	880	14
424	944	14
250	1008	14
267	83	15
93	217	15
551	360	15
441	427	15
190	436	15
778	553	15
693	610	15
806	750	15
463	823	15
707	874	15
929	923	15
544	279	16
314	379	16
265	488	16
382	614	16
758	676	16
49	689	16
552	755	16
720	782	16
291	925	16
166	60	17
612	311	17
502	323	17
25	344	17
197	488	17
694	502	17
454	513	17
313	561	17
706	572	17
753	577	17
24	607	17
821	696	17
935	788	17
870	805	17
640	1002	17
276	257	18
505	382	18
662	420	18
540	426	18
750	529	18
208	801	18
199	183	19
237	375	19
281	445	19
779	467	19
27	503	19
317	646	19
528	520	20
662	643	20
581	690	20
322	759	20
257	834	20
596	850	20
759	928	20
332	155	21
648	377	21
488	497	21
473	555	21
568	794	21
417	348	22
604	526	22
16	653	22
808	827	22
112	88	23
867	560	23
163	823	23
905	901	23
843	817	25
686	352	1
488	572	1
178	624	1
614	698	1
516	726	1
293	96	2
384	154	2
344	172	2
241	198	2
308	208	2
204	225	2
452	253	2
564	265	2
528	276	2
160	314	2
442	316	2
240	337	2
473	360	2
754	393	2
364	622	2
312	686	2
584	976	2
849	997	2
465	1002	2
701	308	3
774	356	3
720	389	3
621	494	3
312	534	3
265	561	3
172	569	3
549	836	3
686	925	3
446	52	4
94	157	4
420	585	4
218	668	4
777	677	4
181	684	4
160	706	4
661	808	4
481	842	4
338	2	5
201	4	5
88	5	5
119	341	5
525	362	5
89	446	5
40	472	5
409	674	5
693	805	5
908	882	5
449	925	5
920	950	5
44	45	6
114	253	6
348	382	6
261	520	6
780	550	6
818	604	6
940	604	6
485	614	6
468	669	6
956	704	6
886	716	6
357	718	6
552	770	6
868	794	6
873	830	6
992	904	6
968	1005	6
340	77	7
192	196	7
833	458	7
904	642	7
602	737	7
894	929	7
290	6	8
144	124	8
397	125	8
840	401	8
396	482	8
660	501	8
626	558	8
660	634	8
742	713	8
356	845	8
432	870	8
638	877	8
813	888	8
713	970	8
546	981	8
229	32	9
409	49	9
138	62	9
390	241	9
404	389	9
281	393	9
544	425	9
160	432	9
405	432	9
480	476	9
821	646	9
340	654	9
454	785	9
521	801	9
724	809	9
1020	878	9
577	916	9
628	189	10
388	278	10
125	288	10
585	301	10
572	354	10
601	373	10
324	429	10
449	541	10
678	570	10
553	605	10
553	656	10
334	725	10
760	912	10
632	1005	10
528	297	11
722	490	11
544	518	11
712	538	11
362	685	11
428	721	11
958	752	11
702	928	11
274	164	12
66	196	12
278	213	12
449	229	12
302	292	12
288	345	12
185	457	12
294	467	12
861	541	12
553	720	12
149	752	12
496	882	12
450	129	13
202	136	13
264	270	13
201	297	13
242	318	13
364	352	13
124	390	13
69	406	13
826	424	13
542	461	13
617	622	13
205	712	13
776	748	13
622	772	13
400	821	13
781	825	13
712	853	13
969	941	13
428	1	14
29	104	14
413	181	14
612	225	14
110	339	14
832	369	14
460	408	14
264	486	14
228	585	14
997	601	14
412	781	14
166	788	14
920	984	14
285	61	15
386	325	15
736	329	15
92	492	15
450	492	15
508	627	15
301	653	15
793	989	15
844	1016	15
120	89	16
332	174	16
433	344	16
256	374	16
576	572	16
1002	721	16
1000	800	16
690	896	16
1004	988	16
176	50	17
110	180	17
216	186	17
526	254	17
272	620	17
865	661	17
814	724	17
366	752	17
326	792	17
930	805	17
310	826	17
952	873	17
389	881	17
65	20	18
164	333	18
376	402	18
598	434	18
812	490	18
324	574	18
596	657	18
725	678	18
914	688	18
669	774	18
194	786	18
588	990	18
498	216	19
701	425	19
364	518	19
484	708	19
628	716	19
586	749	19
454	912	19
608	922	19
806	945	19
874	960	19
341	125	20
812	784	20
624	833	20
650	468	21
764	481	21
768	550	21
698	741	21
728	821	21
389	46	22
306	50	22
116	406	22
606	482	22
722	593	22
448	836	22
870	868	22
335	8	23
709	462	23
816	602	23
660	710	23
764	865	23
642	598	24
770	450	25
852	570	25
693	660	25
91	450	26
937	705	26
824	864	26
717	518	27
629	894	27
461	234	28
502	148	1
354	240	1
438	269	1
102	332	1
576	333	1
470	357	1
674	365	1
170	378	1
341	420	1
374	435	1
700	504	1
769	517	1
101	555	1
725	565	1
793	567	1
779	647	1
665	715	1
889	846	1
640	961	1
163	63	2
376	93	2
610	252	2
413	343	2
211	356	2
800	406	2
828	591	2
1010	628	2
517	674	2
785	731	2
896	922	2
861	981	2
306	15	3
66	144	3
58	228	3
393	244	3
11	338	3
686	413	3
529	426	3
448	466	3
629	486	3
418	499	3
559	512	3
556	740	3
224	87	4
326	121	4
100	142	4
282	205	4
58	289	4
330	355	4
970	476	4
871	531	4
949	591	4
859	745	4
802	779	4
579	834	4
280	127	5
539	258	5
242	433	5
477	513	5
684	563	5
416	218	6
411	380	6
567	389	6
44	393	6
107	427	6
165	497	6
984	581	6
567	607	6
886	656	6
688	729	6
1003	769	6
777	953	6
76	99	7
132	122	7
185	150	7
389	191	7
473	308	7
299	430	7
737	430	7
211	510	7
913	578	7
767	862	7
888	1014	7
50	47	8
126	94	8
214	283	8
677	333	8
662	520	8
867	575	8
628	663	8
952	675	8
523	704	8
740	728	8
593	750	8
18	141	9
165	190	9
540	191	9
96	224	9
330	235	9
296	351	9
782	363	9
666	608	9
740	658	9
878	793	9
944	902	9
166	35	10
453	343	10
788	459	10
994	520	10
558	655	10
699	913	10
384	56	11
556	233	11
423	278	11
719	379	11
273	470	11
12	489	11
233	504	11
74	518	11
612	623	11
941	769	11
678	784	11
1002	863	11
836	979	11
339	16	12
328	172	12
515	291	12
597	345	12
585	450	12
757	483	12
494	717	12
897	865	12
994	912	12
54	392	13
124	393	13
623	419	13
187	446	13
536	462	13
110	565	13
997	685	13
839	693	13
772	824	13
655	852	13
799	866	13
707	1003	13
252	177	14
90	264	14
617	288	14
821	363	14
243	370	14
324	513	14
509	517	14
621	578	14
936	850	14
833	870	14
723	949	14
393	105	15
181	271	15
572	271	15
122	296	15
399	315	15
554	320	15
694	453	15
359	475	15
791	529	15
580	647	15
624	732	15
858	826	15
916	897	15
450	52	16
295	125	16
497	243	16
395	430	16
108	478	16
293	497	16
914	514	16
956	548	16
889	739	16
972	798	16
886	890	16
106	13	17
250	43	17
10	65	17
363	188	17
299	257	17
232	281	17
683	290	17
745	311	17
120	343	17
130	441	17
900	620	17
854	646	17
771	752	17
100	65	18
441	136	18
365	357	18
842	459	18
274	540	18
741	561	18
781	602	18
830	610	18
577	622	18
580	679	18
568	800	18
717	827	18
880	984	18
196	63	19
224	115	19
527	157	19
430	189	19
629	315	19
297	396	19
847	505	19
545	514	19
709	515	19
682	644	19
541	714	19
998	957	19
357	222	20
407	359	20
134	369	20
745	512	20
412	51	21
203	184	21
669	264	21
57	284	21
539	391	21
483	436	21
980	442	21
243	520	21
791	644	21
683	686	21
713	718	21
647	749	21
709	778	21
821	822	21
596	828	21
921	1009	21
298	62	22
499	306	22
733	437	22
992	491	22
875	578	22
676	598	22
178	105	23
482	187	23
628	252	23
443	392	23
373	499	23
518	742	23
683	846	23
972	889	23
315	119	24
223	154	24
468	273	24
724	598	24
523	679	24
149	95	25
356	148	25
719	397	25
462	499	25
639	820	25
750	710	26
423	251	27
286	162	28
343	501	28
999	569	28
994	636	28
1012	671	28
615	787	28
352	152	1
230	180	1
592	288	1
560	308	1
466	368	1
373	377	1
445	436	1
342	757	1
492	812	1
803	827	1
826	877	1
349	305	2
521	430	2
426	557	2
441	607	2
389	720	2
585	811	2
541	850	2
690	905	2
514	912	2
730	965	2
549	1014	2
720	1016	2
124	59	3
254	369	3
349	423	3
623	557	3
647	594	3
313	657	3
632	776	3
723	871	3
662	1009	3
177	466	4
407	479	4
632	499	4
698	611	4
213	737	4
388	113	5
82	222	5
356	333	5
245	399	5
273	678	5
624	682	5
770	748	5
736	825	5
561	473	6
236	528	6
421	569	6
181	606	6
303	718	6
597	738	6
513	741	6
549	788	6
604	848	6
291	98	7
370	131	7
375	266	7
306	461	7
264	480	7
362	538	7
648	539	7
792	800	7
570	932	7
460	970	7
616	250	8
544	425	8
494	600	8
311	685	8
684	957	8
145	3	9
243	7	9
148	134	9
329	160	9
405	215	9
231	381	9
297	382	9
551	611	9
634	712	9
352	720	9
689	857	9
440	905	9
782	917	9
184	35	10
394	54	10
496	110	10
294	185	10
521	382	10
242	434	10
570	543	10
456	732	10
393	785	10
292	252	11
[truncated: 1,585 more rows]
